# Supplementary material for: Long distance homing in the cane toad ( Rhinella marina ) in its native range
Source: Oxford University Press journal article supplement (doi:10.1242/jeb.243048), 2021-12-23
Supplement: jeb243048supp.pdf [file jeb243048supp.pdf]

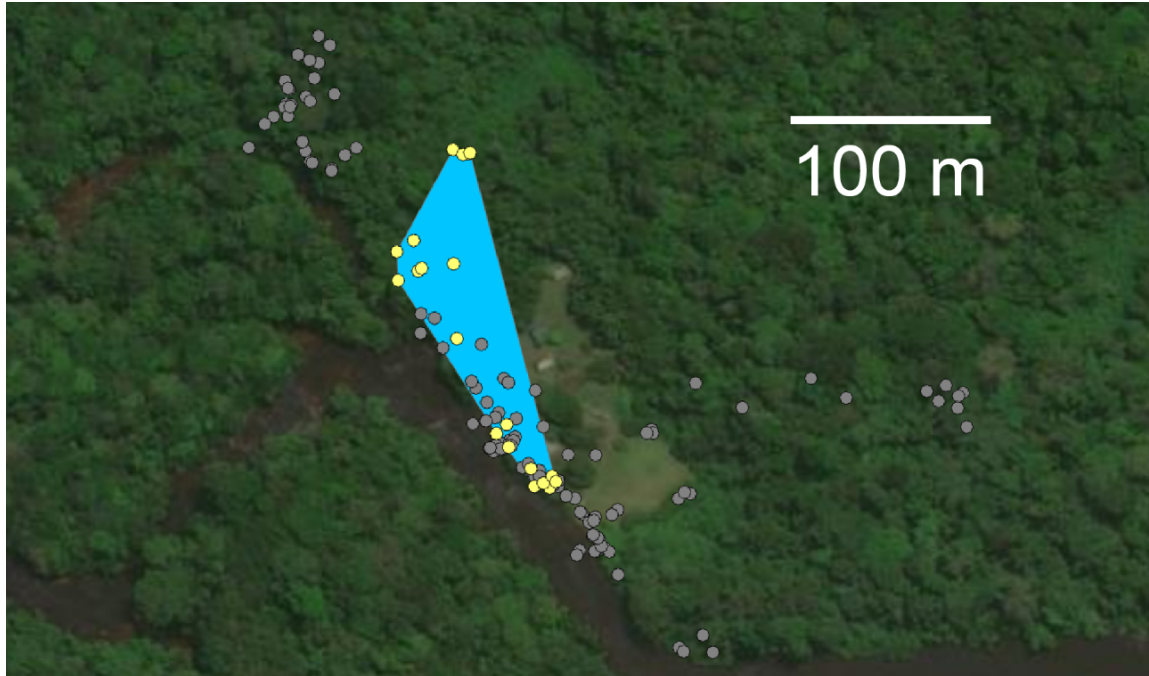

A. Camilita (5568.7 m<sup>2</sup>, 31 days)  
SVL = 18.0 cm  
mass = 0.57 kg

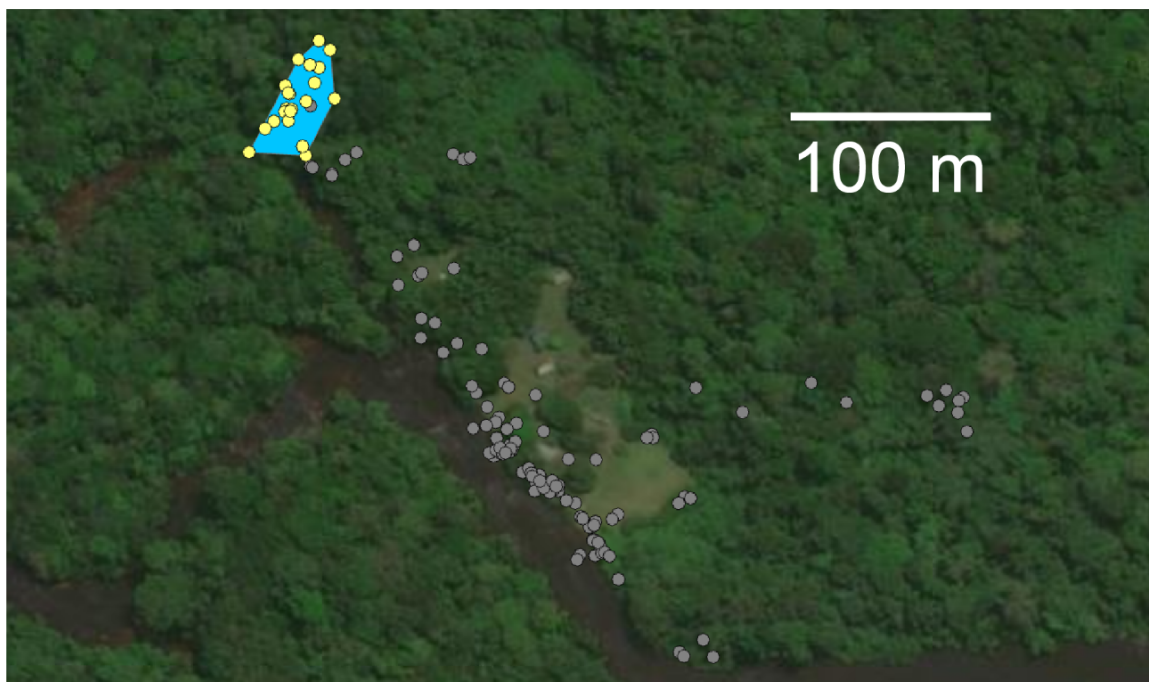

B. Ella (1329.6 m<sup>2</sup>, 55 days)  
SVL = 24.0 cm  
mass = 1.16 kg

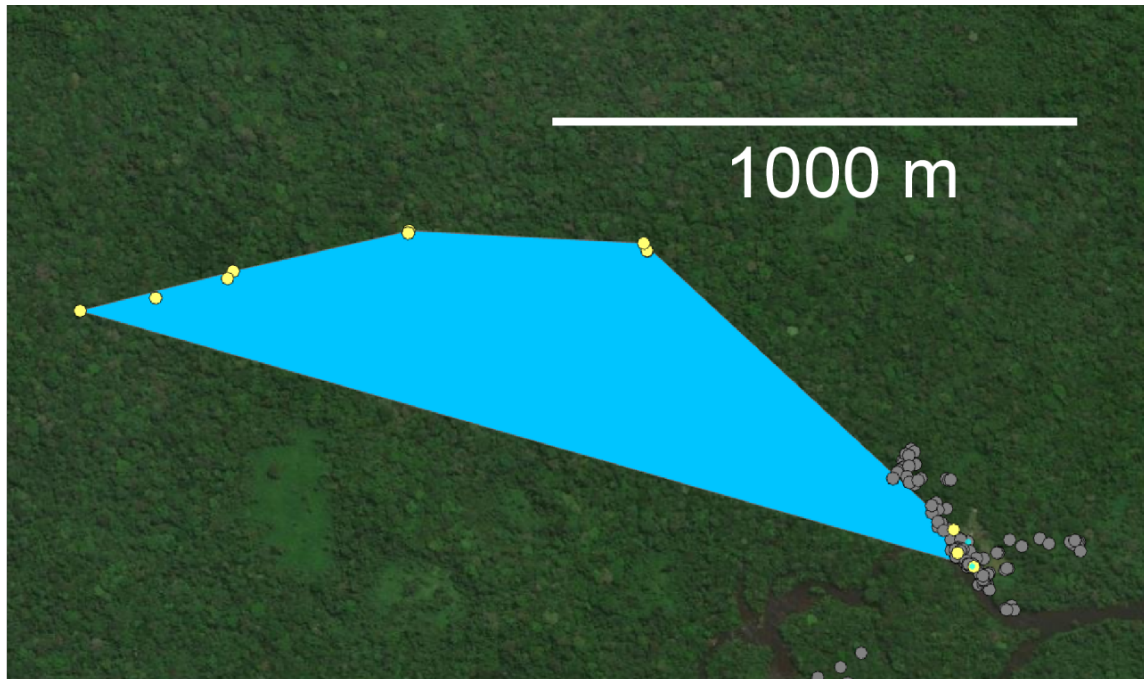

C. Eponine (\*, 16 days)  
SVL = 23.5 cm  
mass = 1.52 kg

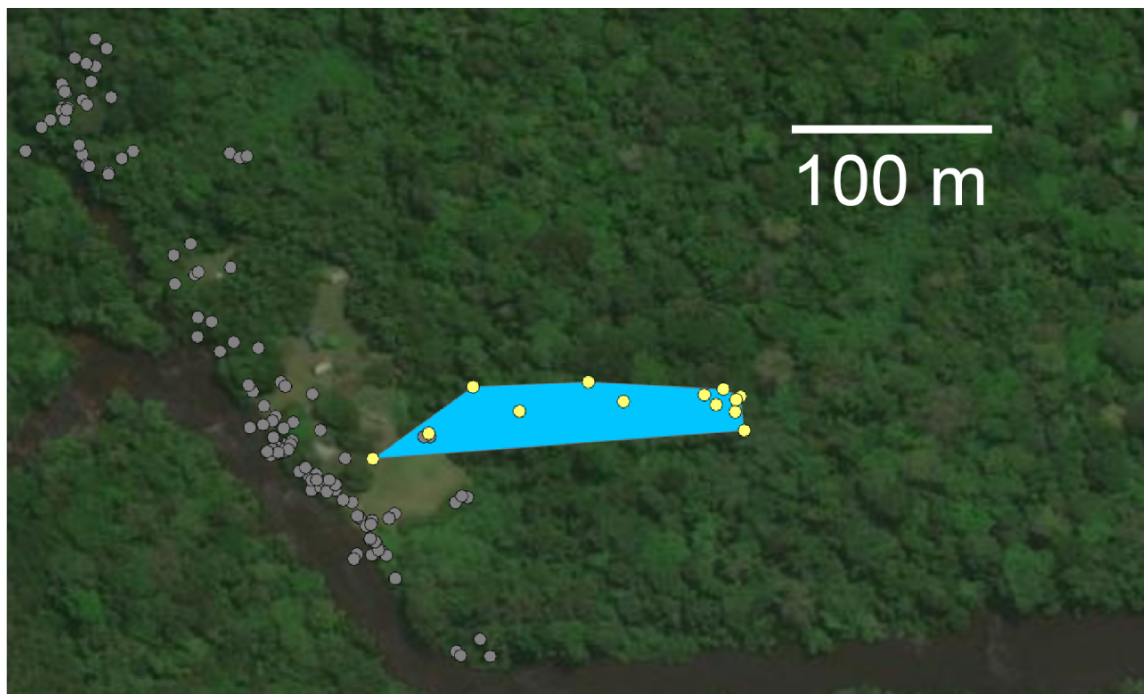

D. Fantine (4522.1 m<sup>2</sup>, 13 days)  
SVL = 21.0 cm  
mass = 1.71 kg

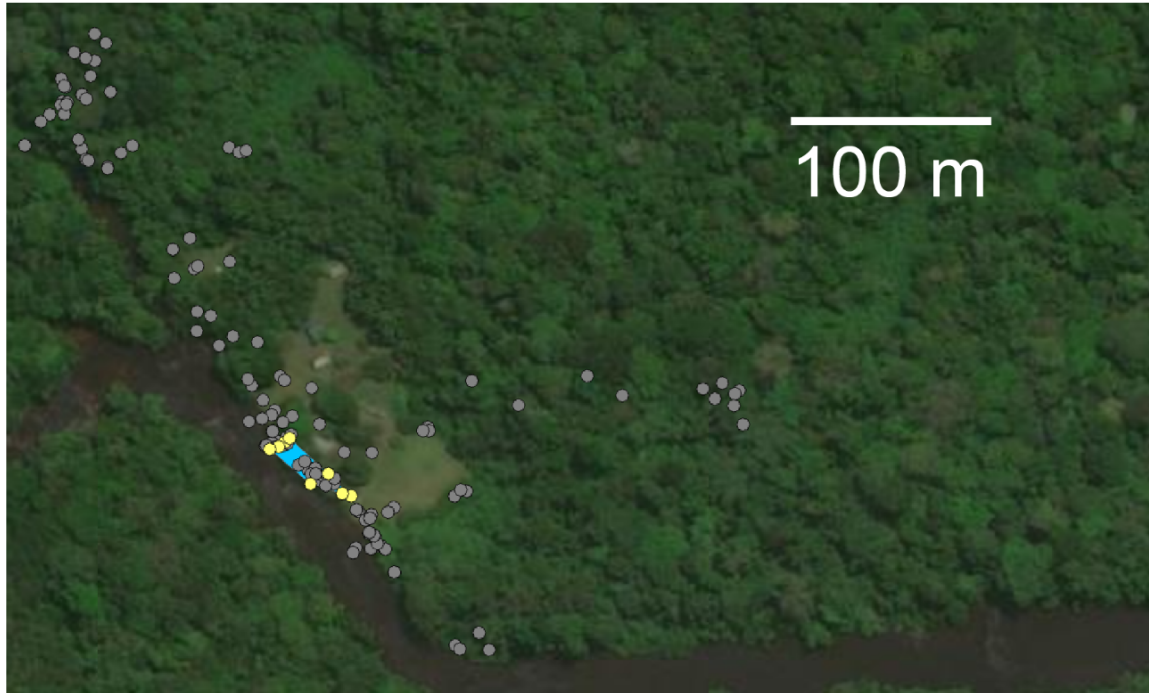

E. Fantomas (352.3 m<sup>2</sup>, 7 days)  
SVL = 14.5 cm  
mass = 0.27 kg

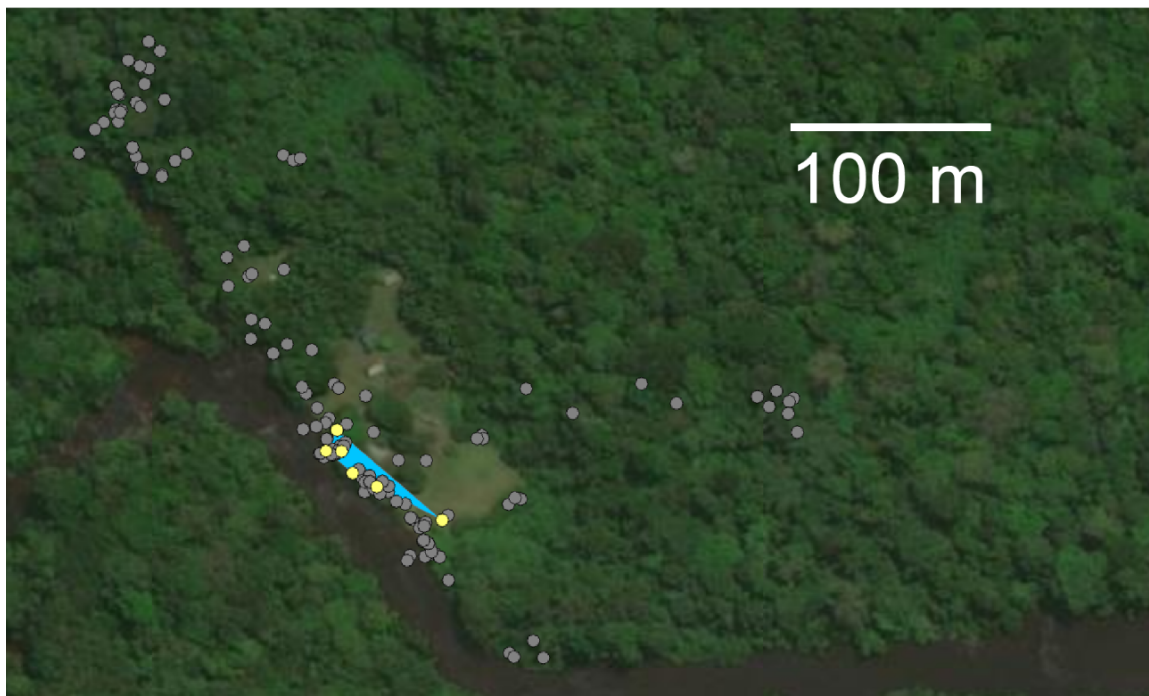

F. Gavroche (498.6 m<sup>2</sup>, 7 days)  
SVL = 11.5 cm  
mass = 0.28 kg

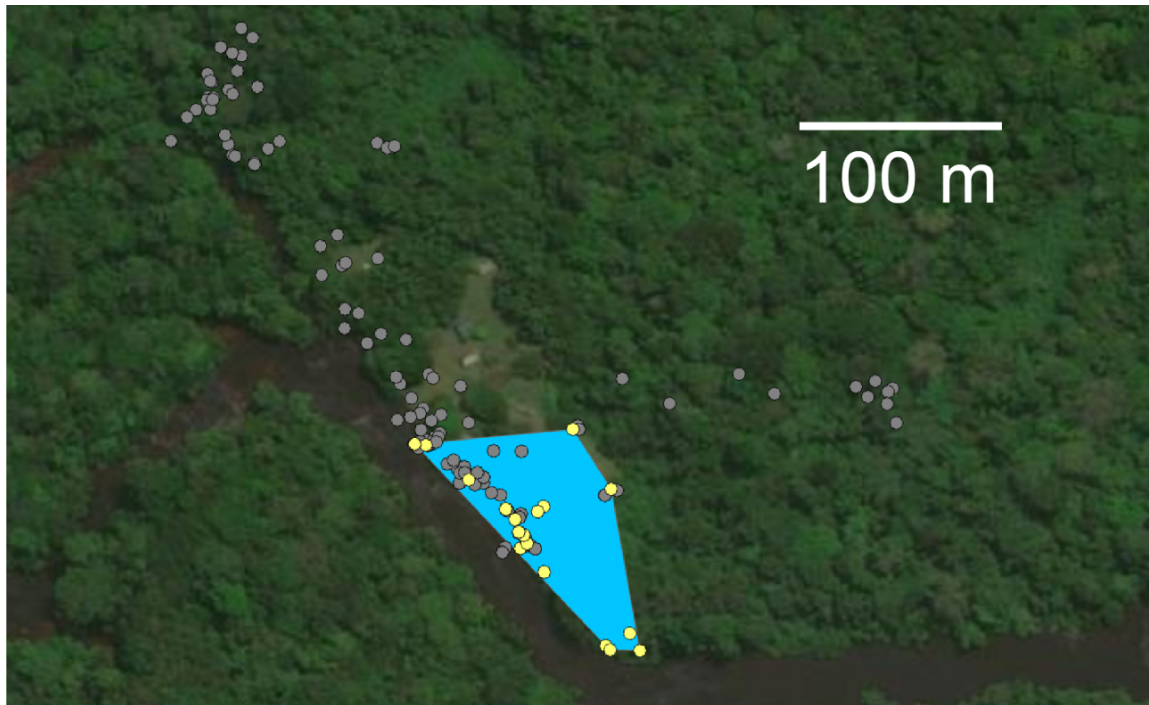

G. Gioigio (5697.0 m<sup>2</sup>, 41 days)  
SVL = 14.5 cm  
mass = 0.36 kg

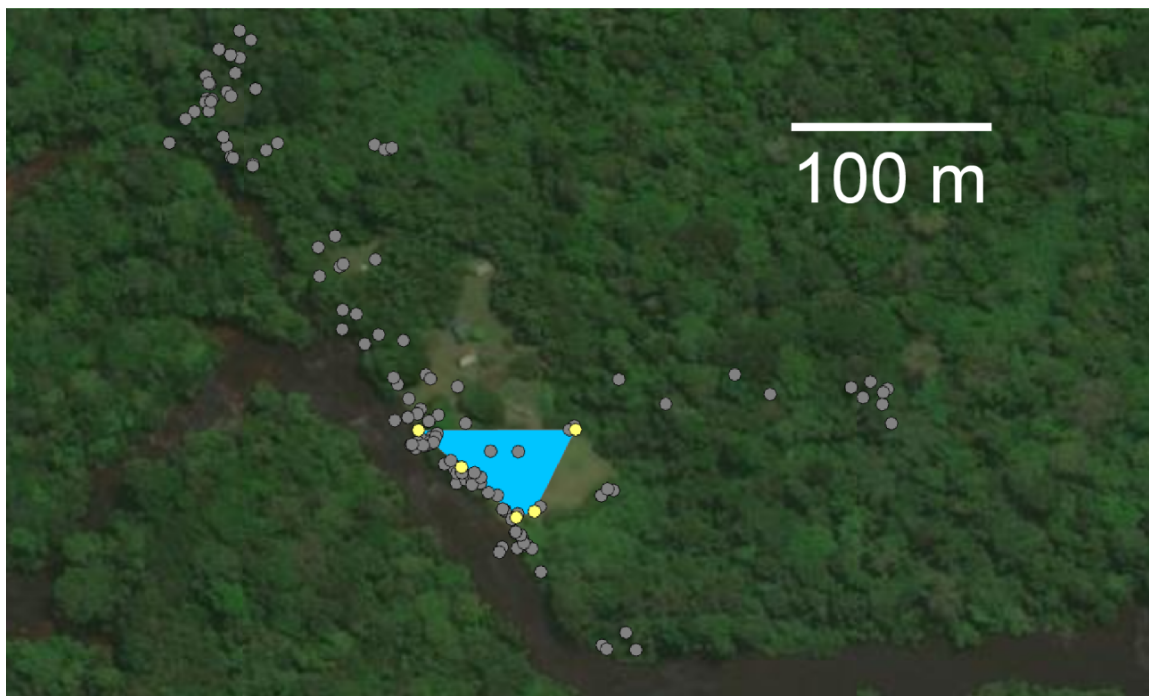

H. tHoAG (1856.0 m<sup>2</sup>, 15 days)  
SVL = 15.5 cm  
mass = 0.34 kg

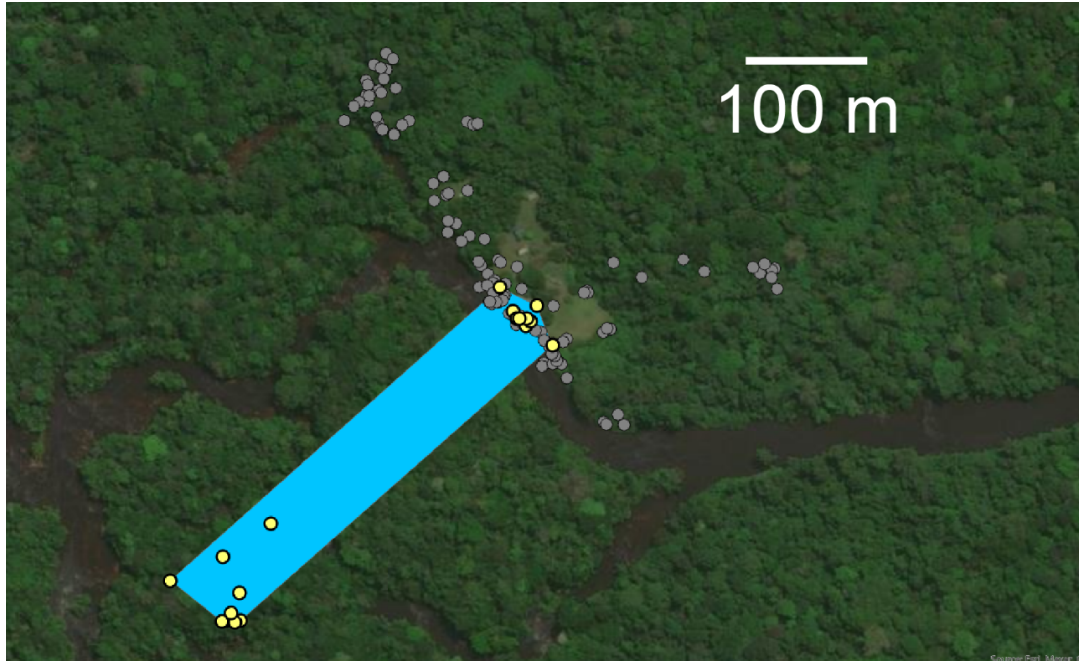

l(i). Javert, all points (23465.9 m<sup>2</sup>, 36 days)  
SVL = 18.0 cm  
mass = 0.47 kg

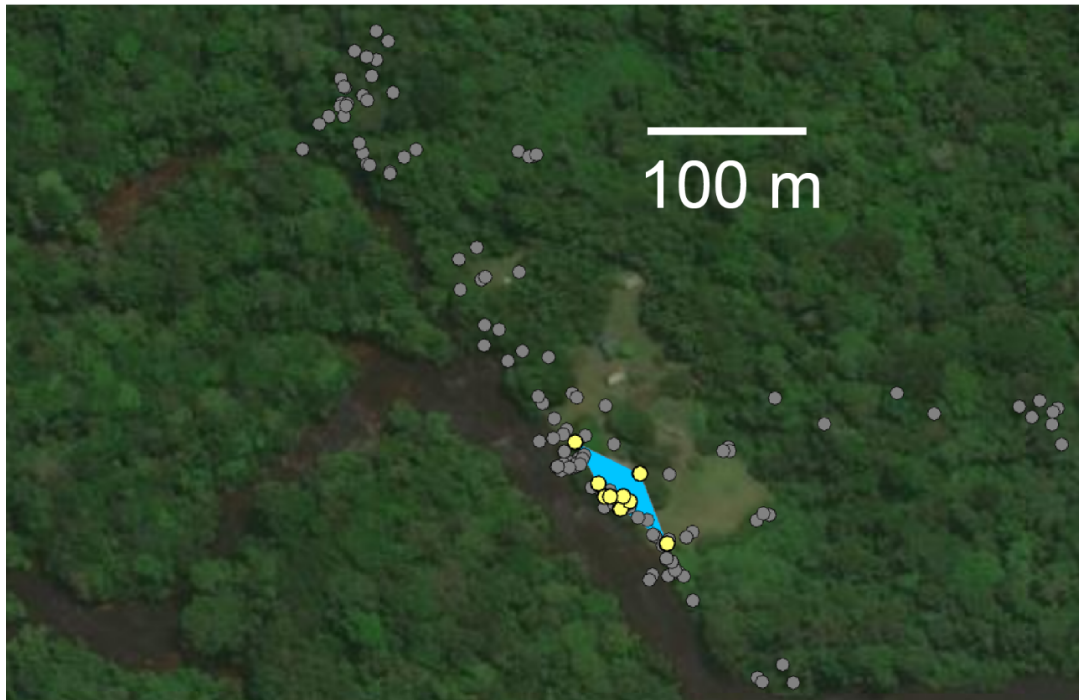

l(ii). Javert, pre-translocation (640.5 m<sup>2</sup>, 21 days)

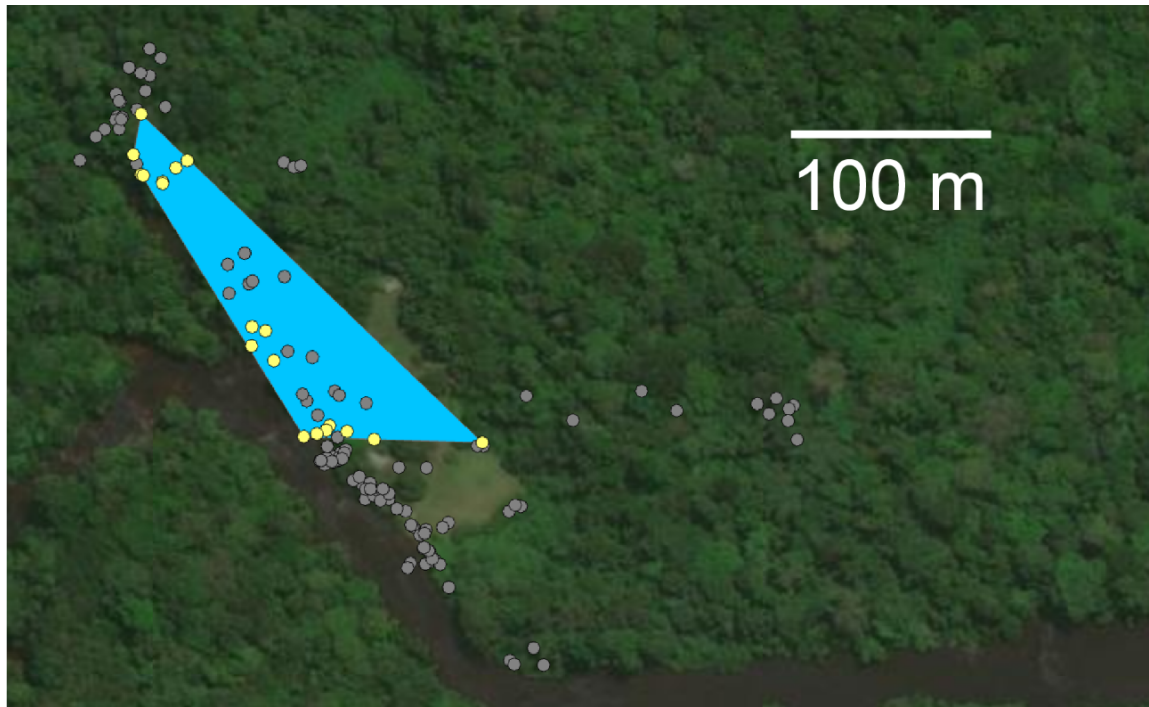

J. Jean Valjean (8375.1 m<sup>2</sup>, 30 days)  
SVL = 14.5 cm  
mass = 0.34 kg

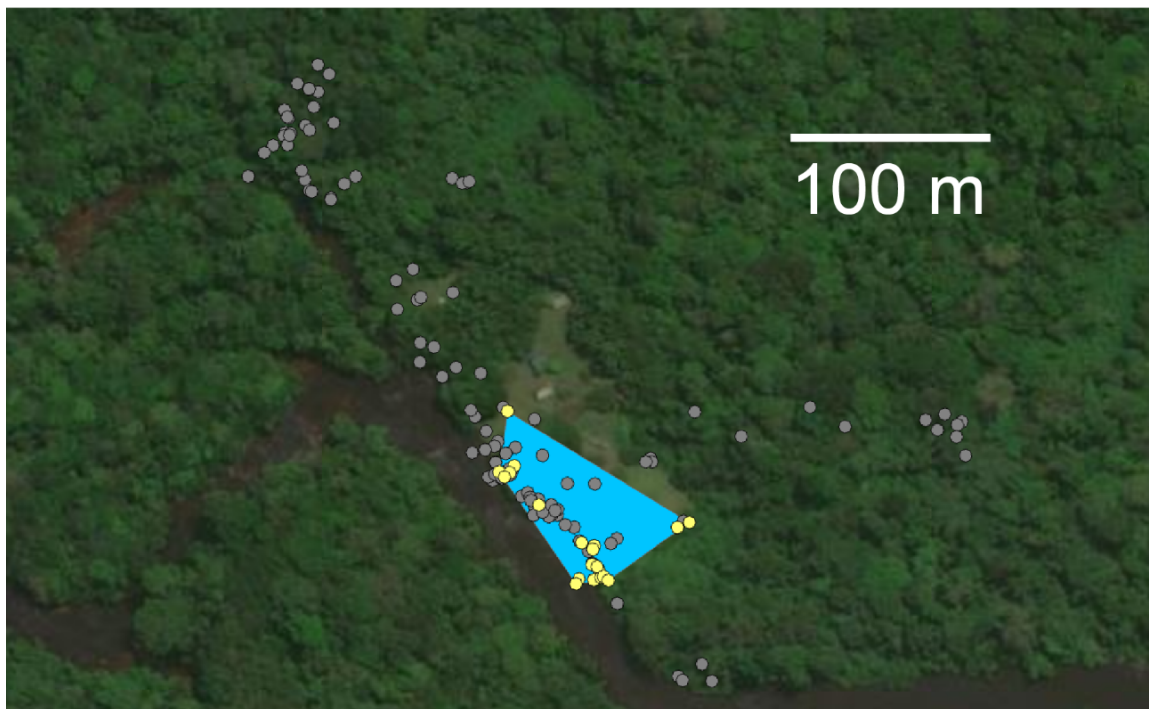

K. Rejean (3868.4 m<sup>2</sup>, 38 days)  
SVL = 14.5 cm  
mass = 0.31 kg

**Fig. S1. Baseline tracking of individual toads.** (A-K) Each panel depicts one of the 11 toads tracked  $\geq 7$  days. Highlighted yellow points mark locations where toad was found and blue polygon depicts the minimum convex polygon (MCP) surrounding the points. Gray points represent locations where other toads were found. In parentheses, the area of the (MCP) and the total number of days the animal was tracked (unadjusted) are given. Measurements of Snout-vent-length (SVL) and mass taken upon untagging of the animals are provided.

Panel I is divided into two parts, one showing all points recorded for Javert (i), and the second showing all points prior to Javert being translocated across a river while in amplexus (ii).

\*No area provided because animal exhibited unidirectional movement

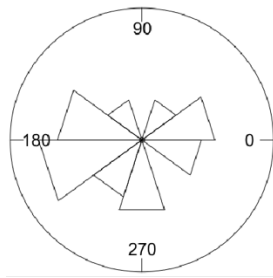

A. Camilita  
SI = 0.18

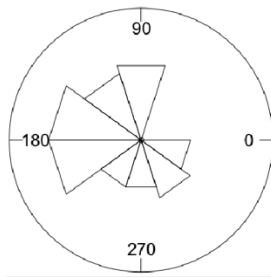

B. Ella  
SI = 0.06

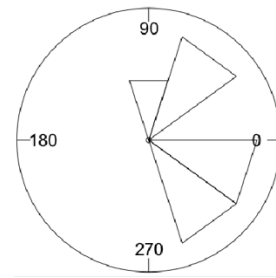

C. Eponine  
SI = 0.89

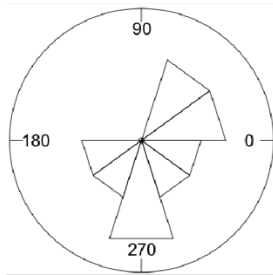

D. Fantine  
SI = 0.70

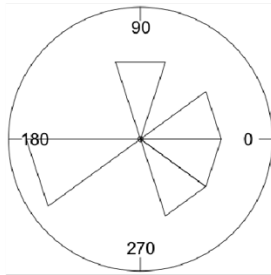

E. Fantomas  
SI = 0.30

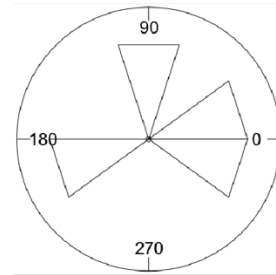

F. Gavroche  
SI = 0.08

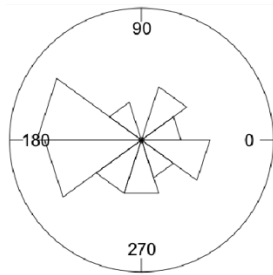

G. Giogio  
SI = 0.01

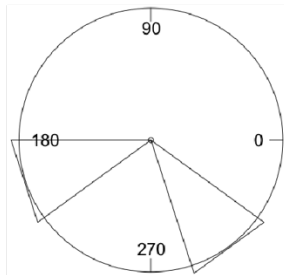

H. The Head of Alfredo Garcia  
SI = 0.27

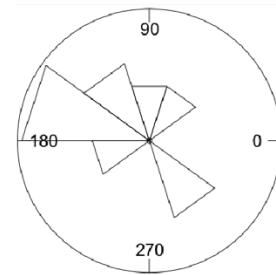

I. Javert  
SI = 0.20

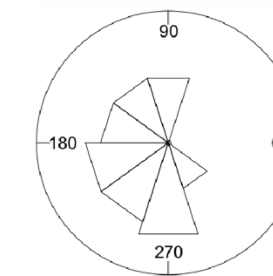

J. Jean Valjean  
SI = 0.10

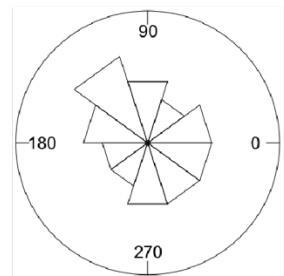

K. Rejean  
SI = 0.07

**Fig. S2. Distribution of relative turn angles during baseline tracking.** (A-K) Rose diagrams for 11 toads tracked for  $\geq 7$  days distributing relative turn angles between movements into ten bins. Clustering of turn angles at 0 degrees indicates unidirectional movement. Straightness Index (SI) calculated for the movement of each toad by dividing net displacement by cumulative path over observation.



**Table S1.**

[Click here to download Table S1](#)

**Table S2.**

[Click here to download Table S2](#)
